# Supplementary material for: Single step fabrication of CuO–MnO–2TiO2 composite thin films with improved photoelectrochemical response
Source: Royal Society of Chemistry journal article supplement (doi:10.1039/c6ra28752b), 2017-01-01
Supplement: c6ra28752b1.pdf [file c6ra28752b1.pdf]

## Electronic Supporting Information (ESI)

### Single step fabrication of CuO-MnO-2TiO<sub>2</sub> composite thin films with improved photoelectrochemical response

Khadija Munawar<sup>a</sup>, Muhammad Adil Mansoor<sup>b</sup>, Wan Jeffrey Basirun<sup>a</sup>, Misni Misran<sup>a</sup>, Nay Ming Huang<sup>b</sup>, Muhammad Mazhar<sup>\*a</sup>

<sup>a</sup>Department of Chemistry, Faculty of Science, University of Malaya, Kuala Lumpur 50603, Malaysia.

<sup>b</sup>Low Dimensional Material Research Centre, Department of Physics, Faculty of Science, University of Malaya, Kuala Lumpur 50603, Malaysia

**\*Corresponding author**      **Email address:** mazhar42pk@yahoo.com

**Telephone No:** +603-79674269

**Mobile Number:** +60162796040

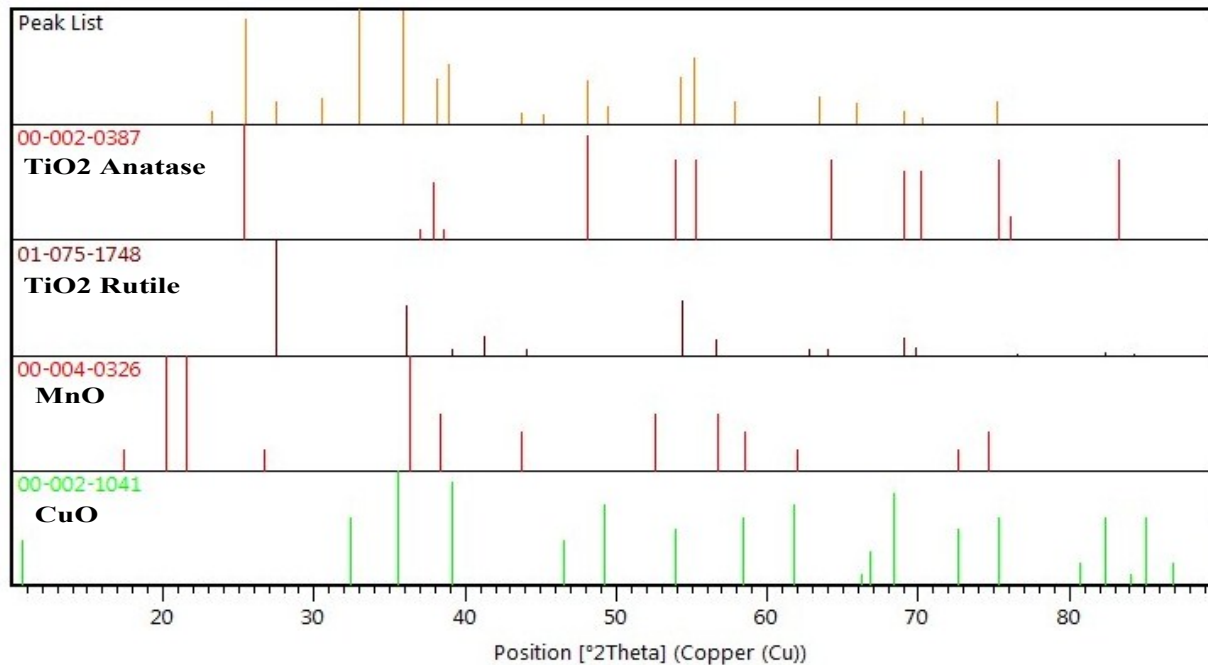

**Fig. S1** Sticky pattern matching of CuO-MnO-2TiO<sub>2</sub> composite thin film with respective standard cards of individual components.

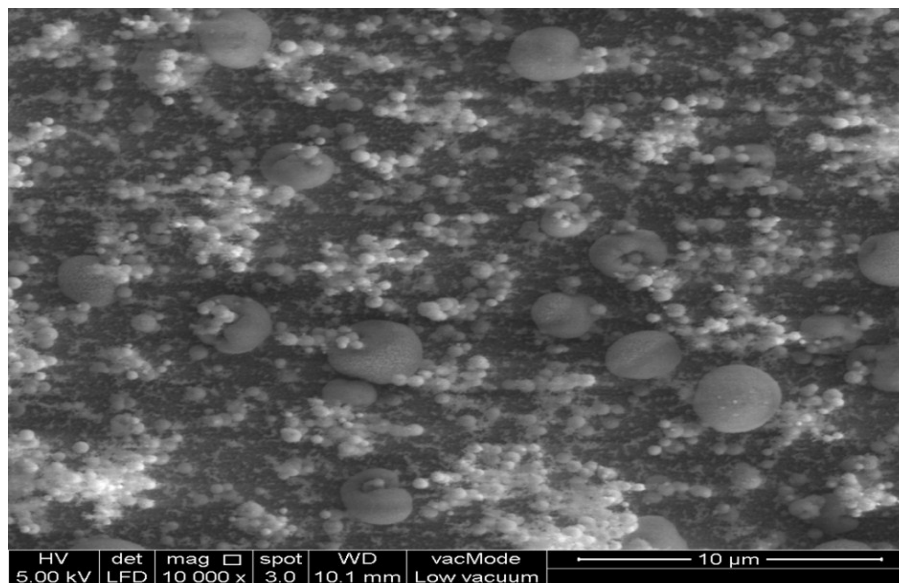

**Fig. S2** FESEM surface image of CuO-MnO-2TiO<sub>2</sub> composite thin film deposited on FTO glass substrate by AACVD at 550°C for 45 minutes under Ar atmosphere.

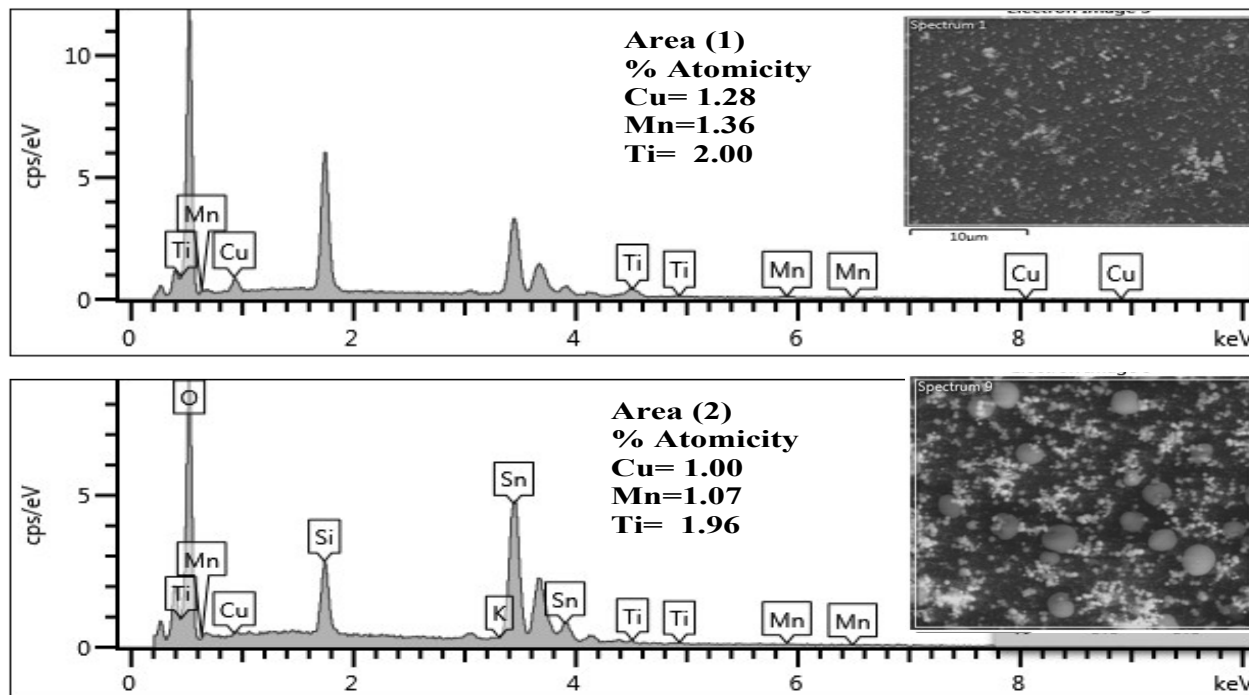

**Fig. S3** EDX spectrum recorded from different areas of CuO-MnO-2TiO<sub>2</sub> composite thin film deposited on FTO substrate by AACVD at 550°C for 45 minutes under Ar atmosphere.

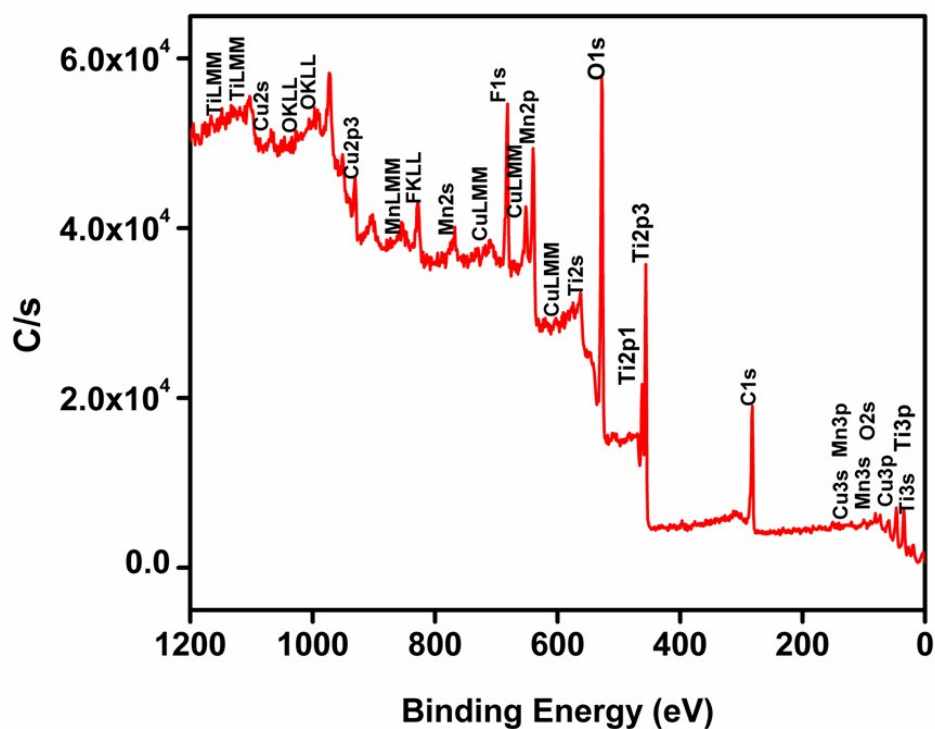

**Fig. S4** Survey scan XPS spectrum of CuO-MnO-2TiO<sub>2</sub> composite thin film.
